# Supplementary material for: Converging Human Intelligence with AI Systems to Advance Flood Evacuation Decision Making
Source: Copernicus journal article supplement (doi:10.5194/nhess-2024-25), 2024-02-15
Supplement: Supplementary file [file nhess-2024-25-AC2-supplement.pdf]

Reviewer 1

Dear authors,

I am not an expert for AI applications in the field of flood risk mitigation;

that's why I will not comment on this; I assume that you developed/applied a scientifically valid approach.

However, even as non-expert in this specific sub-field of natural hazard analysis, I may say that that figures are of poor quality, maps should not be print screens .. but maps with scale etc.

So, practically all figures have to be revised. And, this is important - because, even if AI helps you better identify situations and places where, e.g., evacuation is necessary during a flood event, this information has also to be communicated in an efficient way - and such kind of simplistic representations of your results would not be very helpful I think.

yours

reviewer H

**Response:** Thank you for your comment. We developed a HAC web application and integrated (Wu, 2021) various open-source libraries and packages including Leafmap, a Python package for interactive mapping and geospatial analysis in a Jupyter environment. On the HAC website, the full details of the map can be explored, however, we provided a screenshot of a small portion of the inundation area and evacuation route in the figure. For more details, please visit the HAC web application here: <http://floodevacuationtool.clemson.edu/ML#>

Wu, Q. (2021). Leafmap: A Python package for interactive mapping and geospatial analysis with minimal coding in a Jupyter environment. *Journal of Open Source Software*, 6(63), 3414, <https://doi.org/10.21105/joss.03414>
